# Supplementary material for: The effect of habitual and experimental antiperspirant and deodorant product use on the armpit microbiome
Source: PeerJ. 2016 Feb 2;4:e1605. doi: 10.7717/peerj.1605 (PMC4741080; doi:10.7717/peerj.1605)
Supplement: Table S3 — Note: an asterisk indicates those unique to antiperspirant users. [file peerj-04-1605-s003.xlsx]

## Sheet: Sheet1
Supplement 3: Average abundance of OTUs based on product use group. Note: An asterisk indicates those unique to antiperspirant users
Kingdom	Phylum	Class	Order	Family	Genus		Antiperspirant	Deodorant	No product
Bacteria	Firmicutes	Bacilli	Bacillales	Staphylococcaceae	Other		1200.71	1218	425.8
Bacteria	Actinobacteria	Actinobacteria	Actinomycetales	Corynebacteriaceae	Corynebacterium		282.571	587.6	1231.8
Bacteria	Firmicutes	Clostridia	Clostridiales	Clostridiaceae	Anaerococcus		74.1429	95.2	157
Bacteria	Firmicutes	Bacilli	Bacillales	Alicyclobacillaceae	Alicyclobacillus		53.1429	8.6	10.2
Bacteria	Bacteroidetes	Bacteroidia	Bacteroidales	Porphyromonadaceae	Porphyromonas		28.1429	0	5.4
Bacteria	Firmicutes	Clostridia	Clostridiales	Clostridiaceae			24	0	1.8
Bacteria	Bacteroidetes	Bacteroidia	Bacteroidales	Prevotellaceae	Prevotella		22.8571	0.2	5.8
Bacteria	Firmicutes	Bacilli	Lactobacillales	Streptococcaceae	Streptococcus		20.2857	0.2	0.6
Bacteria	Fusobacteria	Fusobacteria	Fusobacteriales	Fusobacteriaceae	Fusobacterium		19	0	2.8
Bacteria	Bacteroidetes	Flavobacteriia	Flavobacteriales	Flavobacteriaceae	Chryseobacterium		16.1429	0	4.6
Bacteria	Proteobacteria	Alphaproteobacteria	Rhodospirillales	Rhodospirillaceae			15.1429	0	5.8
Bacteria	Firmicutes	Clostridia	Clostridiales	Clostridiaceae	Peptoniphilus		15	2.4	14.2
Bacteria	Proteobacteria	Gammaproteobacteria	Enterobacteriales	Enterobacteriaceae	Escherichia		14.5714	0	11.8
Bacteria	Bacteroidetes	Other	Other	Other	Other		12.2857	0	3.4
Bacteria	Proteobacteria	Gammaproteobacteria	Pasteurellales	Pasteurellaceae	Haemophilus	*	10.1429	0.2	0
Bacteria	Proteobacteria	Alphaproteobacteria	Sphingomonadales	Sphingomonadaceae	Sphingomonas		10	0	4.6
Bacteria	Bacteroidetes	Sphingobacteriia	Sphingobacteriales	Chitinophagaceae			7.85714	0	1.6
Bacteria	Proteobacteria	Gammaproteobacteria	Pseudomonadales	Moraxellaceae	Acinetobacter		7	2.2	2.2
Bacteria	Proteobacteria	Alphaproteobacteria	Rhizobiales	Bradyrhizobiaceae	Other		6.85714	0	1.6
Bacteria	Proteobacteria	Betaproteobacteria	Neisseriales	Neisseriaceae	Neisseria	*	6	0	0
Bacteria	Actinobacteria	Actinobacteria	Actinomycetales	Micrococcaceae	Micrococcus		5.71429	0.6	0.4
Bacteria	Proteobacteria	Gammaproteobacteria	Enterobacteriales	Enterobacteriaceae	Other		5.42857	0.2	2
Bacteria	Firmicutes	Bacilli	Bacillales	Staphylococcaceae	Staphylococcus		5.42857	15.2	8.2
Bacteria	Other	Other	Other	Other	Other		5.28571	3	6.8
Bacteria	Armatimonadetes	[Fimbriimonadetes]	[Fimbriimonadales]	[Fimbriimonadaceae]	Fimbriimonas		5.14286	0	1.6
Bacteria	Proteobacteria	Gammaproteobacteria	Pseudomonadales	Pseudomonadaceae			5	0.6	0.6
Bacteria	Proteobacteria	Alphaproteobacteria	Sphingomonadales	Sphingomonadaceae	Novosphingobium		4.85714	0	1.8
Bacteria	Firmicutes	Clostridia	Clostridiales	Veillonellaceae	Veillonella	*	4.28571	0	0.2
Bacteria	Cyanobacteria	Chloroplast	Streptophyta				4.14286	0.6	0.2
Bacteria	Proteobacteria	Alphaproteobacteria	Caulobacterales	Caulobacteraceae			4	0	1.2
Bacteria	Proteobacteria	Gammaproteobacteria	Xanthomonadales	Sinobacteraceae			4	0	0.8
Bacteria	Proteobacteria	Deltaproteobacteria	Myxococcales	0319-6G20		*	3.85714	0	0.4
Bacteria	Proteobacteria	Alphaproteobacteria	Rhizobiales	Other	Other	*	3.85714	0	0
Bacteria	Elusimicrobia	Elusimicrobia	Elusimicrobiales				3.57143	0	1
Bacteria	Actinobacteria	Actinobacteria	Actinomycetales	Micrococcaceae	Rothia	*	3.14286	0	0
Bacteria	Proteobacteria	Gammaproteobacteria	Pseudomonadales	Pseudomonadaceae	Pseudomonas		2.85714	0	0.6
Bacteria	Firmicutes	Bacilli	Bacillales	Other	Other		2.85714	0.8	2
Bacteria	Firmicutes	Clostridia	Clostridiales	Clostridiaceae	Other	*	2.57143	0.6	0.4
Bacteria	Proteobacteria	Betaproteobacteria	Neisseriales	Neisseriaceae		*	2.28571	0.4	0.2
Bacteria	Firmicutes	Bacilli	Lactobacillales	Enterococcaceae	Enterococcus	*	2.28571	6.2	0
Bacteria	Actinobacteria	Actinobacteria	Actinomycetales	Actinomycetaceae	Actinomyces		2.14286	0	0.6
Bacteria	Actinobacteria	Actinobacteria	Actinomycetales	Actinomycetaceae	Mobiluncus		2.14286	0	0.6
Bacteria	Firmicutes	Other	Other	Other	Other		2.14286	6.4	1.6
Bacteria	Proteobacteria	Deltaproteobacteria	Myxococcales			*	2	0	0.2
Bacteria	Firmicutes	Clostridia	Clostridiales	Other	Other	*	1.85714	0.2	0.2
Bacteria	Proteobacteria	Betaproteobacteria	Burkholderiales	Comamonadaceae	Other		1.71429	0	0.6
Bacteria	Firmicutes	Clostridia	Clostridiales	Veillonellaceae	Dialister	*	1.71429	0	0.2
Bacteria	Firmicutes	Clostridia	Clostridiales	Clostridiaceae	Finegoldia		1.71429	32	19.8
Bacteria	Proteobacteria	Gammaproteobacteria	Xanthomonadales	Xanthomonadaceae	Stenotrophomonas		1.71429	1	0
Bacteria	Actinobacteria	Actinobacteria	Actinomycetales	Other	Other		1.71429	1	1.6
Bacteria	Firmicutes	Bacilli	Gemellales	Gemellaceae	Other	*	1.57143	0	0
Bacteria	Actinobacteria	Actinobacteria	Actinomycetales	Cellulomonadaceae	Cellulomonas	*	1.57143	0	0
Bacteria	Proteobacteria	Betaproteobacteria	Burkholderiales	Comamonadaceae	Hylemonella		1.57143	0	13.2
Bacteria	Firmicutes	Bacilli	Other	Other	Other		1.42857	9.6	0.6
Bacteria	Firmicutes	Clostridia	Clostridiales	Peptococcaceae	Peptococcus	*	1.42857	0	0
Bacteria	Proteobacteria	Epsilonproteobacteria	Campylobacterales	Campylobacteraceae	Campylobacter		1.28571	1.8	17.2
Bacteria	Proteobacteria	Alphaproteobacteria	Rhodospirillales	Acetobacteraceae	Roseomonas	*	1.28571	0	0
Bacteria	Actinobacteria	Actinobacteria	Actinomycetales	Intrasporangiaceae	Other	*	1.14286	0	0
Bacteria	Bacteroidetes	Flavobacteriia	Flavobacteriales	Flavobacteriaceae	Other		1	0.4	4.8
Bacteria	Actinobacteria	Actinobacteria	Actinomycetales	Microbacteriaceae	Other	*	1	0	0
Bacteria	Proteobacteria	Betaproteobacteria	Burkholderiales	Alcaligenaceae	Achromobacter	*	1	0	0
Bacteria	Proteobacteria	Gammaproteobacteria	Xanthomonadales	Sinobacteraceae	Nevskia	*	1	0	0
Unclassified	Other	Other	Other	Other	Other	*	1	0	0
Bacteria	Cyanobacteria	Chloroplast	Other	Other	Other	*	0.857143	0	0
Bacteria	Cyanobacteria	Oscillatoriophycideae	Chroococcales	Phormidiaceae		*	0.857143	0	0
Bacteria	Actinobacteria	Actinobacteria	Actinomycetales	Brevibacteriaceae	Brevibacterium		0.857143	0.2	1
Bacteria	Acidobacteria	Solibacteres	Solibacterales	Solibacteraceae	Candidatus Solibacter	*	0.857143	0	0.2
Bacteria	Proteobacteria	Alphaproteobacteria	Caulobacterales	Caulobacteraceae	Caulobacter	*	0.857143	0.2	0.4
Bacteria	Firmicutes	Clostridia	Clostridiales	Clostridiaceae	Clostridium		0.857143	0.4	1.6
Bacteria	Actinobacteria	Actinobacteria	Actinomycetales	Actinomycetaceae	Parascardovia	*	0.857143	0	0
Bacteria	Proteobacteria	Betaproteobacteria	Other	Other	Other	*	0.714286	0	0
Bacteria	Proteobacteria	Gammaproteobacteria	Oceanospirillales	Halomonadaceae	Other	*	0.714286	0	0.2
Bacteria	Firmicutes	Clostridia	Clostridiales	Veillonellaceae	Other	*	0.714286	0	0
Bacteria	Proteobacteria	Gammaproteobacteria	Pseudomonadales	Moraxellaceae	Enhydrobacter	*	0.714286	0.2	0.2
Bacteria	Firmicutes	Bacilli	Lactobacillales	Aerococcaceae	Facklamia		0.714286	0.8	0.4
Bacteria	Actinobacteria	Actinobacteria	Actinomycetales	Propionibacteriaceae	Propionibacterium	*	0.714286	0.2	0
Bacteria	Proteobacteria	Betaproteobacteria	Burkholderiales	Comamonadaceae	Rubrivivax	*	0.714286	0	0.4
Bacteria	Acidobacteria	Acidobacteria-2				*	0.571429	0	0.4
Bacteria	Proteobacteria	Alphaproteobacteria	Other	Other	Other	*	0.571429	0	0.4
Bacteria	Proteobacteria	Betaproteobacteria	Burkholderiales	Oxalobacteraceae	Other	*	0.571429	0	0
Bacteria	Proteobacteria	Gammaproteobacteria	Pseudomonadales	Pseudomonadaceae	Other	*	0.571429	0	0
Bacteria	Thermi	Deinococci	Deinococcales	Deinococcaceae	Deinococcus	*	0.571429	0	0
Bacteria	Actinobacteria	Actinobacteria	Actinomycetales	Dermacoccaceae	Dermacoccus	*	0.571429	0	0
Bacteria	Actinobacteria	Actinobacteria	Actinomycetales	Dietziaceae	Dietzia	*	0.571429	0	0
Bacteria	Actinobacteria	Actinobacteria	Actinomycetales	Micrococcaceae	Kocuria	*	0.571429	0	0.2
Bacteria	Firmicutes	Bacilli	Lactobacillales	Lactobacillaceae	Lactobacillus	*	0.571429	0	0
Bacteria	Proteobacteria	Alphaproteobacteria	Rhodobacterales	Rhodobacteraceae	Paracoccus	*	0.571429	0	0.2
Bacteria	Proteobacteria	Alphaproteobacteria	Rhodospirillales	Rhodospirillaceae	Skermanella	*	0.571429	0	0
Bacteria	Proteobacteria	Other	Other	Other	Other	*	0.571429	0	0.4
Bacteria	Firmicutes	Clostridia	Clostridiales	Veillonellaceae	Negativicoccus		0.285714	0.2	2
Bacteria	Actinobacteria	Actinobacteria	Actinomycetales	Dermabacteraceae	Dermabacter		0.142857	0.4	4
Bacteria	Proteobacteria	Gammaproteobacteria	Enterobacteriales	Enterobacteriaceae	Proteus		0.142857	0	1.2
