# Supplementary material for: The effect of habitual and experimental antiperspirant and deodorant product use on the armpit microbiome
Source: PeerJ. 2016 Feb 2;4:e1605. doi: 10.7717/peerj.1605 (PMC4741080; doi:10.7717/peerj.1605)
Supplement: Table S4 [file peerj-04-1605-s004.xlsx]

## Sheet: Sheet1
Supplemental Table 4: OTUs differentially abundant between product use groups with a q-value threshold of 0.05.
						No Product Use		Ceased Deodorant Use		Ceased Antiperspirant Use		No Prod-Deod	No Prod-Antip	Deod-Antip
Kingdom	Phylum	Class	Order	Family	Genus	Mean	Std Err	Mean	Std Err	Mean	Std Err	q value	q value	q value
Bacteria	Acidobacteria	Acidobacteria-2										not significant	not significant	not significant
Bacteria	Acidobacteria	Solibacteres	Solibacterales	Solibacteraceae	Candidatus Solibacter							not significant	not significant	not significant
Bacteria	Actinobacteria	Actinobacteria	Actinomycetales	Actinomycetaceae	Actinomyces							not significant	not significant	not significant
Bacteria	Actinobacteria	Actinobacteria	Actinomycetales	Actinomycetaceae	Mobiluncus							not significant	not significant	not significant
Bacteria	Actinobacteria	Actinobacteria	Actinomycetales	Actinomycetaceae	Parascardovia							not significant	not significant	not significant
Bacteria	Actinobacteria	Actinobacteria	Actinomycetales	Brevibacteriaceae	Brevibacterium							not significant	not significant	not significant
Bacteria	Actinobacteria	Actinobacteria	Actinomycetales	Cellulomonadaceae	Cellulomonas							not significant	not significant	not significant
Bacteria	Actinobacteria	Actinobacteria	Actinomycetales	Corynebacteriaceae	Corynebacterium	0.617854	0.0108844	0.294589	0.0102061	0.142354	0.00783863	1.65249e-207	1.06653e-90	1.96025e-29
Bacteria	Actinobacteria	Actinobacteria	Actinomycetales	Dermabacteraceae	Dermabacter							not significant	not significant	not significant
Bacteria	Actinobacteria	Actinobacteria	Actinomycetales	Dermacoccaceae	Dermacoccus							not significant	not significant	not significant
Bacteria	Actinobacteria	Actinobacteria	Actinomycetales	Dietziaceae	Dietzia							not significant	not significant	not significant
Bacteria	Actinobacteria	Actinobacteria	Actinomycetales	Intrasporangiaceae	Other							not significant	not significant	not significant
Bacteria	Actinobacteria	Actinobacteria	Actinomycetales	Microbacteriaceae	Other							not significant	not significant	not significant
Bacteria	Actinobacteria	Actinobacteria	Actinomycetales	Micrococcaceae	Kocuria							not significant	not significant	not significant
Bacteria	Actinobacteria	Actinobacteria	Actinomycetales	Micrococcaceae	Micrococcus							not significant	not significant	not significant
Bacteria	Actinobacteria	Actinobacteria	Actinomycetales	Micrococcaceae	Rothia							not significant	not significant	not significant
Bacteria	Actinobacteria	Actinobacteria	Actinomycetales	Other	Other							not significant	not significant	not significant
Bacteria	Actinobacteria	Actinobacteria	Actinomycetales	Propionibacteriaceae	Propionibacterium							not significant	not significant	not significant
Bacteria	Armatimonadetes	[Fimbriimonadetes]	[Fimbriimonadales]	[Fimbriimonadaceae]	Fimbriimonas							not significant	not significant	not significant
Bacteria	Bacteroidetes	Bacteroidia	Bacteroidales	Porphyromonadaceae	Porphyromonas	0.00250752	0.00112027	0	0	0.0140845	0.00264358	0.000771015	1	2.90365e-06
Bacteria	Bacteroidetes	Bacteroidia	Bacteroidales	Prevotellaceae	Prevotella	0.00300903	0.00122689	0	0	0.0115694	0.002399	0.0123004	0.775965	2.02802e-05
Bacteria	Bacteroidetes	Flavobacteriia	Flavobacteriales	Flavobacteriaceae	Chryseobacterium	0.00250752	0.00112027	0	0	0.00804829	0.00200446	0.0545109	1	6.42585e-05
Bacteria	Bacteroidetes	Flavobacteriia	Flavobacteriales	Flavobacteriaceae	Other							not significant	not significant	not significant
Bacteria	Bacteroidetes	Other	Other	Other	Other	0.00150451	0.000868195	0	0	0.00603622	0.00173768	0.0649739	1	0.000788033
Bacteria	Bacteroidetes	Sphingobacteriia	Sphingobacteriales	Chitinophagaceae		0.00100301	0.000709057	0	0	0.00402414	0.00142024	0.148997	1	0.0096248
Bacteria	Cyanobacteria	Chloroplast	Other	Other	Other							not significant	not significant	not significant
Bacteria	Cyanobacteria	Chloroplast	Streptophyta									not significant	not significant	not significant
Bacteria	Cyanobacteria	Oscillatoriophycideae	Chroococcales	Phormidiaceae								not significant	not significant	not significant
Bacteria	Elusimicrobia	Elusimicrobia	Elusimicrobiales									not significant	not significant	not significant
Bacteria	Firmicutes	Bacilli	Bacillales	Alicyclobacillaceae	Alicyclobacillus	0.00501505	0.00158231	0.00450902	0.00149999	0.02666	0.00361379	1.19047e-06	1	6.84076e-07
Bacteria	Firmicutes	Bacilli	Bacillales	Other	Other							not significant	not significant	not significant
Bacteria	Firmicutes	Bacilli	Bacillales	Staphylococcaceae	Other	0.213641	0.00918119	0.61022	0.010919	0.604125	0.0109709	7.46289e-137	8.54084e-140	0.332858
Bacteria	Firmicutes	Bacilli	Bacillales	Staphylococcaceae	Staphylococcus							not significant	not significant	not significant
Bacteria	Firmicutes	Bacilli	Gemellales	Gemellaceae	Other							not significant	not significant	not significant
Bacteria	Firmicutes	Bacilli	Lactobacillales	Aerococcaceae	Facklamia							not significant	not significant	not significant
Bacteria	Firmicutes	Bacilli	Lactobacillales	Enterococcaceae	Enterococcus							not significant	not significant	not significant
Bacteria	Firmicutes	Bacilli	Lactobacillales	Lactobacillaceae	Lactobacillus							not significant	not significant	not significant
Bacteria	Firmicutes	Bacilli	Lactobacillales	Streptococcaceae	Streptococcus	0.000501505	0.000501505	0	0	0.0100604	0.00223878	0.000108259	1	7.04496e-06
Bacteria	Firmicutes	Bacilli	Other	Other	Other	0.000501505	0.000501505	0.00501002	0.00158073	0.000503018	0.000503018	0.575387	0.725703	0.0260298
Bacteria	Firmicutes	Clostridia	Clostridiales	Clostridiaceae	Anaerococcus	0.0787362	0.00603289	0.0475952	0.00476673	0.0372233	0.00424689	5.48353e-07	0.0115694	0.14312
Bacteria	Firmicutes	Clostridia	Clostridiales	Clostridiaceae	Clostridium							not significant	not significant	not significant
Bacteria	Firmicutes	Clostridia	Clostridiales	Clostridiaceae	Finegoldia	0.0100301	0.00223208	0.0160321	0.00281199	0.00100604	0.000711196	0.000771015	1	8.3696e-07
Bacteria	Firmicutes	Clostridia	Clostridiales	Clostridiaceae	Other							not significant	not significant	not significant
Bacteria	Firmicutes	Clostridia	Clostridiales	Clostridiaceae	Peptoniphilus	0.00702106	0.00187033	0.001002	0.000708346	0.00754527	0.00194131	0.526161	0.164135	0.00338665
Bacteria	Firmicutes	Clostridia	Clostridiales	Clostridiaceae		0.00100301	0.000709057	0	0	0.0120724	0.00244997	0.000306864	1	1.36648e-05
Bacteria	Firmicutes	Clostridia	Clostridiales	Other	Other							not significant	not significant	not significant
Bacteria	Firmicutes	Clostridia	Clostridiales	Peptococcaceae	Peptococcus							not significant	not significant	not significant
Bacteria	Firmicutes	Clostridia	Clostridiales	Veillonellaceae	Dialister							not significant	not significant	not significant
Bacteria	Firmicutes	Clostridia	Clostridiales	Veillonellaceae	Negativicoccus							not significant	not significant	not significant
Bacteria	Firmicutes	Clostridia	Clostridiales	Veillonellaceae	Other							not significant	not significant	not significant
Bacteria	Firmicutes	Clostridia	Clostridiales	Veillonellaceae	Veillonella							not significant	not significant	not significant
Bacteria	Firmicutes	Other	Other	Other	Other							not significant	not significant	not significant
Bacteria	Fusobacteria	Fusobacteria	Fusobacteriales	Fusobacteriaceae	Fusobacterium	0.00150451	0.000868195	0	0	0.00955734	0.00218265	0.0024586	1	1.18221e-05
Bacteria	Other	Other	Other	Other	Other							not significant	not significant	not significant
Bacteria	Proteobacteria	Alphaproteobacteria	Caulobacterales	Caulobacteraceae	Caulobacter							not significant	not significant	not significant
Bacteria	Proteobacteria	Alphaproteobacteria	Caulobacterales	Caulobacteraceae								not significant	not significant	not significant
Bacteria	Proteobacteria	Alphaproteobacteria	Other	Other	Other							not significant	not significant	not significant
Bacteria	Proteobacteria	Alphaproteobacteria	Rhizobiales	Bradyrhizobiaceae	Other	0.00100301	0.000709057	0	0	0.00352113	0.00132885	0.22783	1	0.0181859
Bacteria	Proteobacteria	Alphaproteobacteria	Rhizobiales	Other	Other							not significant	not significant	not significant
Bacteria	Proteobacteria	Alphaproteobacteria	Rhodobacterales	Rhodobacteraceae	Paracoccus							not significant	not significant	not significant
Bacteria	Proteobacteria	Alphaproteobacteria	Rhodospirillales	Acetobacteraceae	Roseomonas							not significant	not significant	not significant
Bacteria	Proteobacteria	Alphaproteobacteria	Rhodospirillales	Rhodospirillaceae	Skermanella							not significant	not significant	not significant
Bacteria	Proteobacteria	Alphaproteobacteria	Rhodospirillales	Rhodospirillaceae		0.00300903	0.00122689	0	0	0.00754527	0.00194131	0.148997	0.775965	0.000105763
Bacteria	Proteobacteria	Alphaproteobacteria	Sphingomonadales	Sphingomonadaceae	Novosphingobium							not significant	not significant	not significant
Bacteria	Proteobacteria	Alphaproteobacteria	Sphingomonadales	Sphingomonadaceae	Sphingomonas	0.00250752	0.00112027	0	0	0.00503018	0.00158708	0.314065	1	0.00272716
Bacteria	Proteobacteria	Betaproteobacteria	Burkholderiales	Alcaligenaceae	Achromobacter							not significant	not significant	not significant
Bacteria	Proteobacteria	Betaproteobacteria	Burkholderiales	Comamonadaceae	Hylemonella	0.00651956	0.00180275	0	0	0.00100604	0.000711196	0.0296519	0.0148648	0.218339
Bacteria	Proteobacteria	Betaproteobacteria	Burkholderiales	Comamonadaceae	Other							not significant	not significant	not significant
Bacteria	Proteobacteria	Betaproteobacteria	Burkholderiales	Comamonadaceae	Rubrivivax							not significant	not significant	not significant
Bacteria	Proteobacteria	Betaproteobacteria	Burkholderiales	Oxalobacteraceae	Other							not significant	not significant	not significant
Bacteria	Proteobacteria	Betaproteobacteria	Neisseriales	Neisseriaceae	Neisseria	0	0	0	0	0.00301811	0.00123059	0.0544382	1	0.032658
Bacteria	Proteobacteria	Betaproteobacteria	Neisseriales	Neisseriaceae								not significant	not significant	not significant
Bacteria	Proteobacteria	Betaproteobacteria	Other	Other	Other							not significant	not significant	not significant
Bacteria	Proteobacteria	Deltaproteobacteria	Myxococcales	0319-6G20								not significant	not significant	not significant
Bacteria	Proteobacteria	Deltaproteobacteria	Myxococcales									not significant	not significant	not significant
Bacteria	Proteobacteria	Epsilonproteobacteria	Campylobacterales	Campylobacteraceae	Campylobacter	0.00852558	0.00205944	0.001002	0.000708346	0.000503018	0.000503018	0.000827251	0.0324269	0.438549
Bacteria	Proteobacteria	Gammaproteobacteria	Enterobacteriales	Enterobacteriaceae	Escherichia	0.00601805	0.00173246	0	0	0.00754527	0.00194131	0.381763	0.0238677	0.000105763
Bacteria	Proteobacteria	Gammaproteobacteria	Enterobacteriales	Enterobacteriaceae	Other							not significant	not significant	not significant
Bacteria	Proteobacteria	Gammaproteobacteria	Enterobacteriales	Enterobacteriaceae	Proteus							not significant	not significant	not significant
Bacteria	Proteobacteria	Gammaproteobacteria	Oceanospirillales	Halomonadaceae	Other							not significant	not significant	not significant
Bacteria	Proteobacteria	Gammaproteobacteria	Pasteurellales	Pasteurellaceae	Haemophilus	0	0	0	0	0.00503018	0.00158708	0.0045769	1	0.00272716
Bacteria	Proteobacteria	Gammaproteobacteria	Pseudomonadales	Moraxellaceae	Acinetobacter							not significant	not significant	not significant
Bacteria	Proteobacteria	Gammaproteobacteria	Pseudomonadales	Moraxellaceae	Enhydrobacter							not significant	not significant	not significant
Bacteria	Proteobacteria	Gammaproteobacteria	Pseudomonadales	Pseudomonadaceae	Other							not significant	not significant	not significant
Bacteria	Proteobacteria	Gammaproteobacteria	Pseudomonadales	Pseudomonadaceae	Pseudomonas							not significant	not significant	not significant
Bacteria	Proteobacteria	Gammaproteobacteria	Pseudomonadales	Pseudomonadaceae								not significant	not significant	not significant
Bacteria	Proteobacteria	Gammaproteobacteria	Xanthomonadales	Sinobacteraceae	Nevskia							not significant	not significant	not significant
Bacteria	Proteobacteria	Gammaproteobacteria	Xanthomonadales	Sinobacteraceae								not significant	not significant	not significant
Bacteria	Proteobacteria	Gammaproteobacteria	Xanthomonadales	Xanthomonadaceae	Stenotrophomonas							not significant	not significant	not significant
Bacteria	Proteobacteria	Other	Other	Other	Other							not significant	not significant	not significant
Bacteria	Thermi	Deinococci	Deinococcales	Deinococcaceae	Deinococcus							not significant	not significant	not significant
Unclassified	Other	Other	Other	Other	Other							not significant	not significant	not significant
